# Supplementary material
Source: PubMed Central journal article supplement (PMC6704460)

# Supplemental Materials

## Supplemental Videos

**Supplemental Video 1. Representative video showing the MFB–MFB dynamism.** Control SICM scans between MFB–MFB.  $n = 20$  images, 1.5-h recording.

**Supplemental Video 2. Representative video showing the CM–MFB dynamism.** Control SICM scans between CM–MFB. The cardiomyocyte is the bottom cell (brighter yellow); the myofibroblast is the cell at the top.  $n = 9$  images, 1-h recording.

## Supplemental Figures

**Supplemental Figure 1. GFP–Cx43 knockdown in myofibroblasts.** Representative images of myofibroblasts labelled with a lipophilic membrane dye (DiI) and GFP-positive cells. Scale bar, 100  $\mu\text{m}$ .

dil/phase

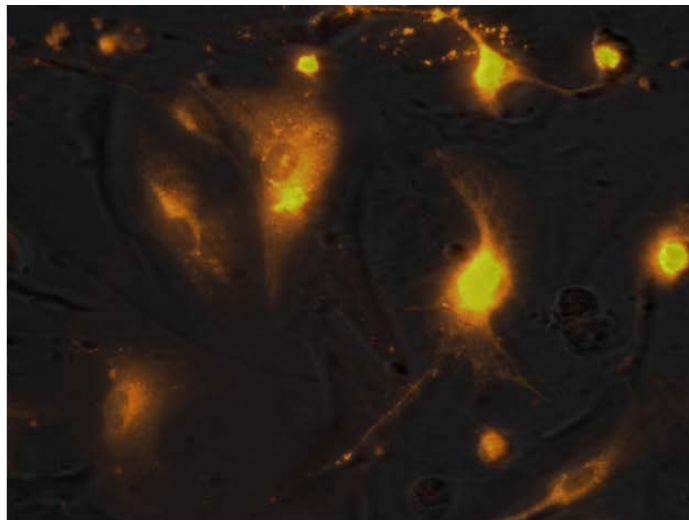

GFP\_Cx43Kd/phase

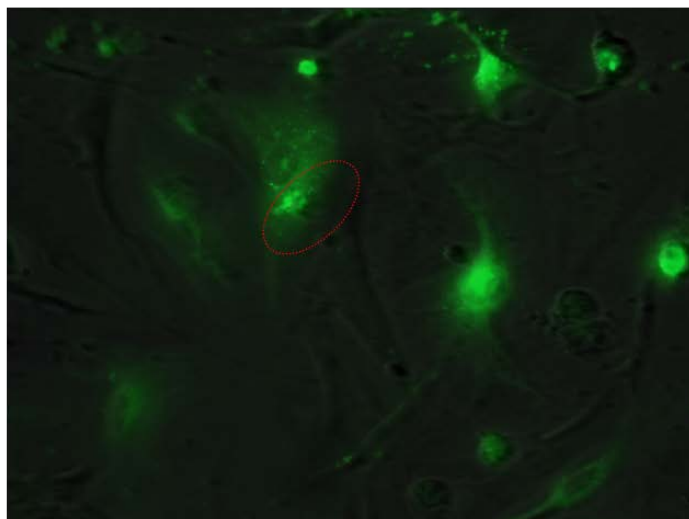

**Supplemental Figure 2. Dynamism in control and heptanol-treated CM–CM, CM–MFB and MFB–MFB contacts. a,** Representative set of scans for CM–MFB and MFB–MFB heptanol-treated samples. **b,** Movement speed of the contacts.

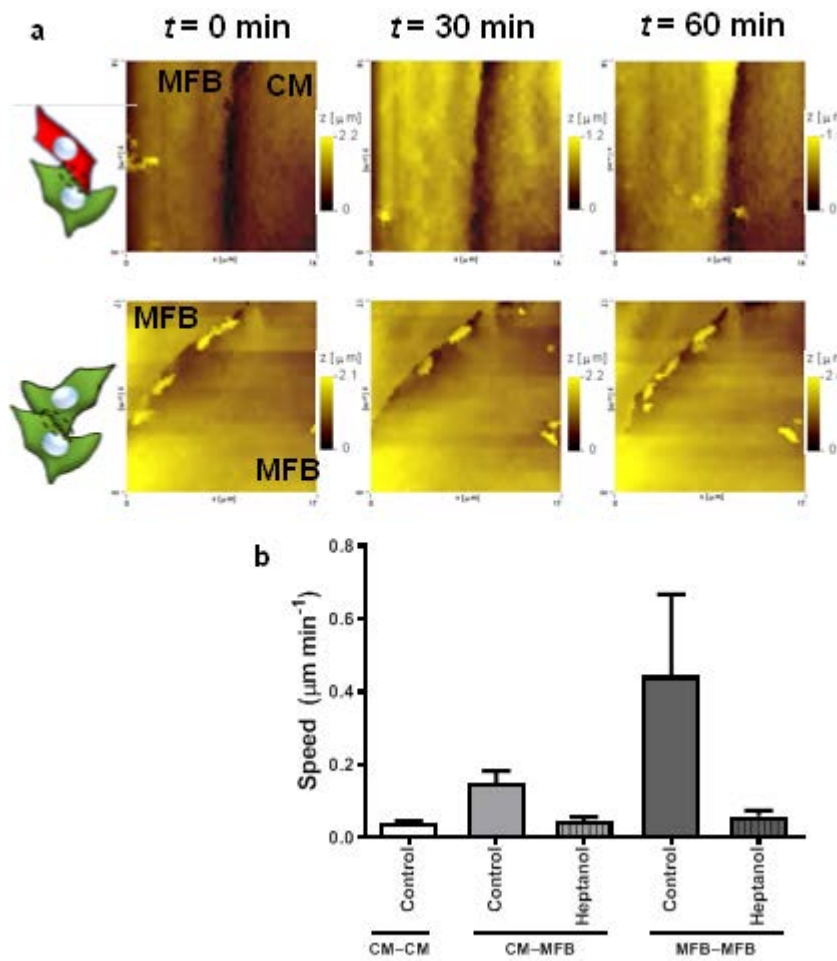

**Supplemental Figure 3. Hypoxia internalizes Cx43 in myofibroblasts and the effect of hypoxia pretreatment on neonatal CM–MFB co-cultures.** **a**, Representative live-cell confocal images of parachute assays between neonatal CM–MFB co-cultures under normoxia (control) and after 24-h hypoxia treatment. Scale bars, 10  $\mu$ m. **b**, Amount of calcein transferred represented as the percentage change from control normoxic conditions for normoxia-treated co-cultures ( $n = 32$  images,  $n = 3$  isolations) and hypoxia-treated co-cultures ( $n = 35$  images,  $n = 3$  isolations).  $**P < 0.001$ ; Student's  $t$ -test. **c**, Representative images of immunostaining of myofibroblasts. Green, vimentin; red, Cx43; blue, Hoechst. Scale bars, 13  $\mu$ m.

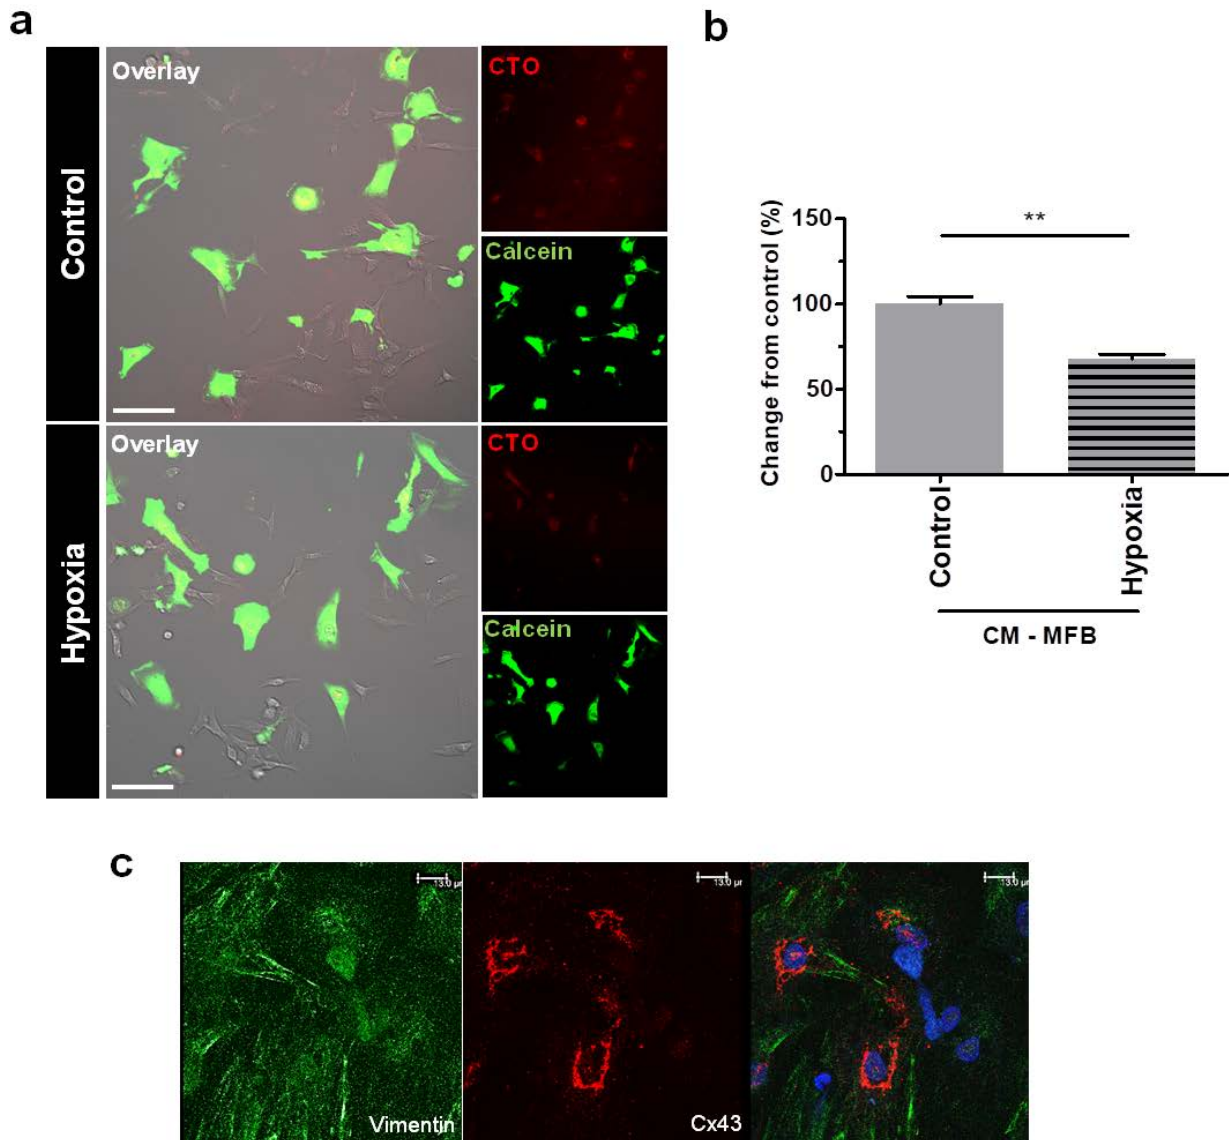

**Supplemental Figure 4. Effect of latrunculin-B treatment on adult rat MFB cultures.** **a**, Representative SICM dynamism scans of control and latrunculin-B-treated MFB–MFB cell pairs from sham-operated adult rats. **b**, Mean speed of contact movement from untreated control ( $n = 15$  scan sets,  $n = 3$  isolations) and latrunculin-B-treated ( $n = 18$  scan sets,  $n = 3$  isolations) MFB–MFB cultures from sham-operated adult rats. Results from myocardial infarction assays are shown for clarity (as shown in Fig. 6g).  $*P < 0.05$ ;  $**P < 0.01$ ; Student's  $t$ -test. Significant effects of both condition (sham versus myocardial infarction ( $P = 0.0006$ )) and treatment (control versus latrunculin-B ( $P = 0.0364$ )) on contact dynamism was found (two-way ANOVA), but the interaction between treatment and condition was not significant. **c**, Representative live-cell confocal images of parachute assays between MFB–MFB cultures from sham that were untreated (control) or treated with latrunculin-B for 24 h. Scale bars, 10  $\mu\text{m}$ . **d**, Amount of calcein transferred represented as a percentage of control for untreated cultures ( $n = 26$  images,  $n = 3$  isolations) and latrunculin-B-treated cultures ( $n = 29$  images,  $n = 3$  isolations).  $***P < 0.0001$ ; Student's  $t$ -test.

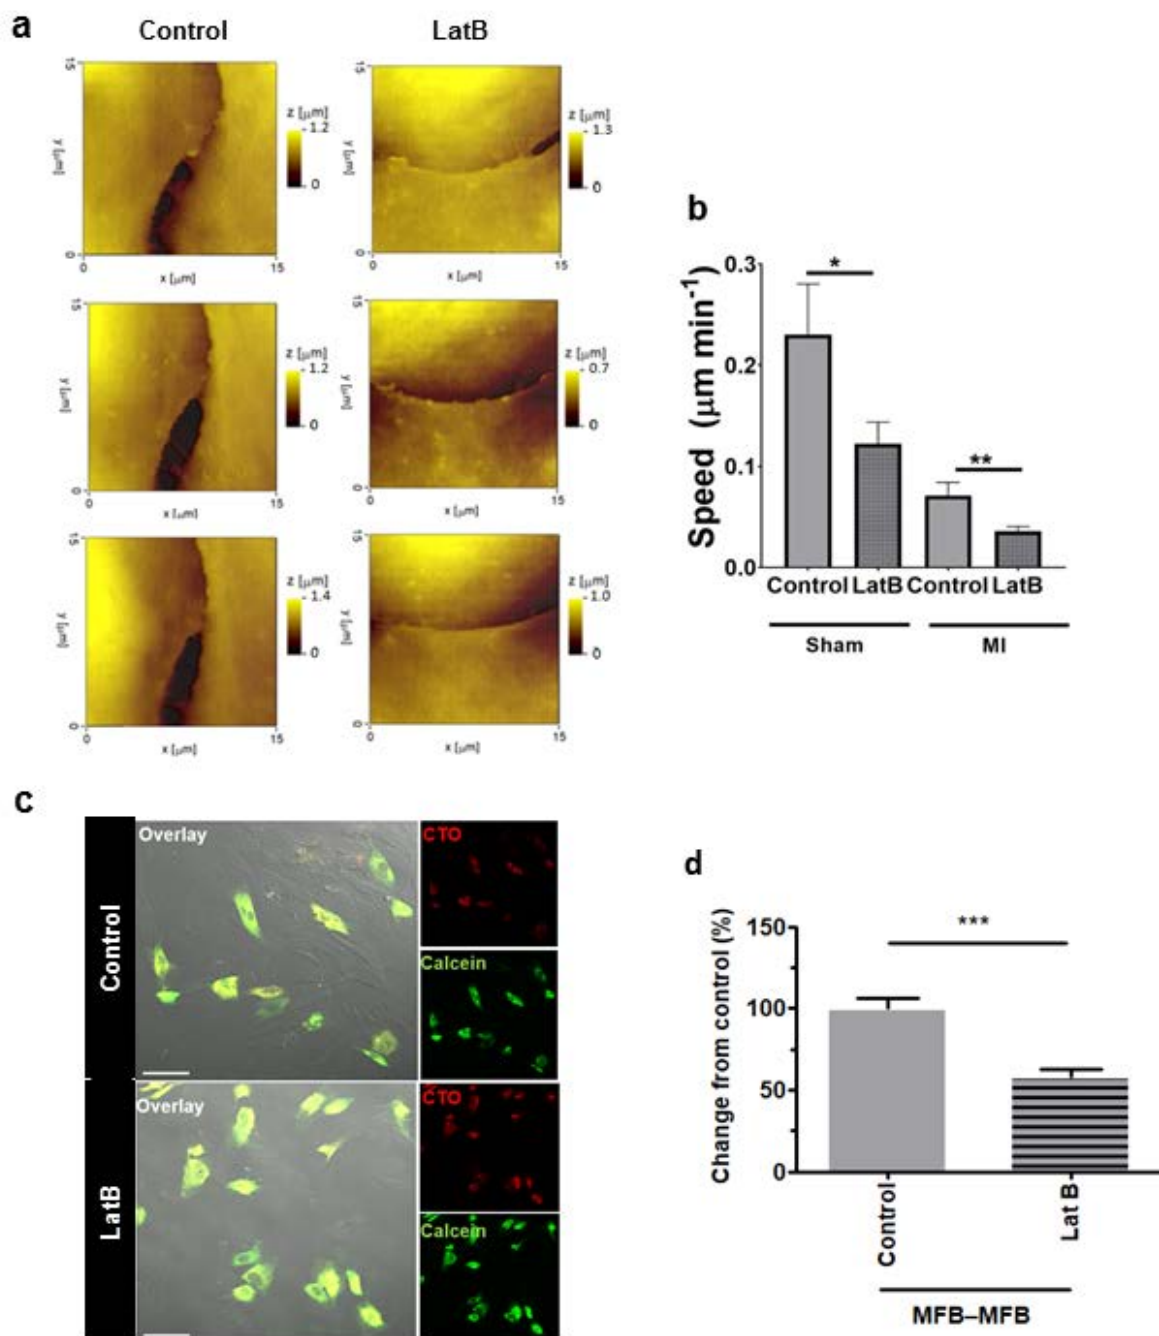

Supplement: fj.201802740RR.sd1.pdf [file fj.201802740RR.sd1.pdf]
